# Supplementary material for: Antagonistic effects of intraspecific cooperation and interspecific competition on thermal performance
Source: eLife journal article supplement (doi:10.7554/elife.57022), 2020-08-17
Supplement: supp [file elife-57022-supp-v1.zip]

1

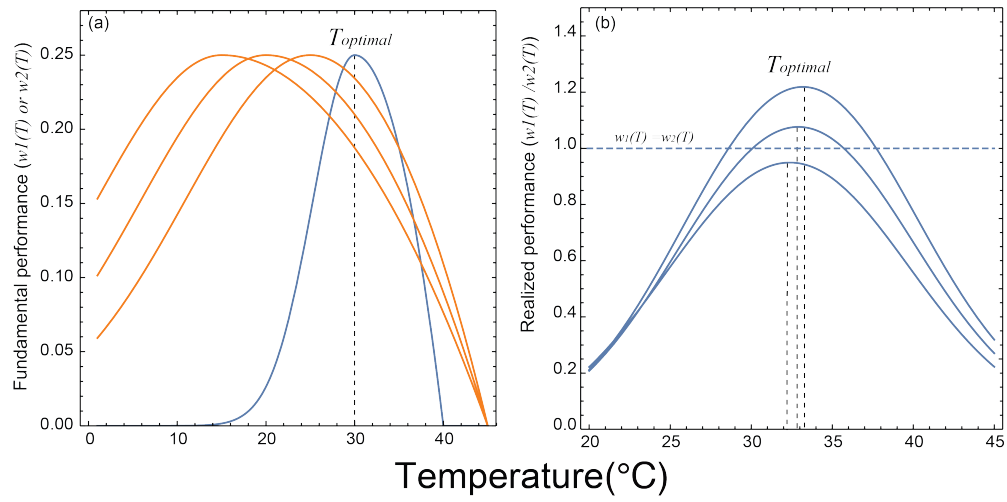

2

3

4 **Figure S1.** (a) Fundamental and (b) realized thermal performance curves (TPC) when  
 5 a high temperature specialist species (blue lines) competes with a low temperature  
 6 generalist species (orange lines).  $T_{\text{optimal}}$  represents the optimal temperature of the  
 7 TPCs, as shown by vertical dashed lines. The horizontal dashed line represents the  
 8 relative performance of the two species, which are equal to each other.

9

10
