# Supplementary material for: Antagonistic effects of intraspecific cooperation and interspecific competition on thermal performance
Source: eLife journal article supplement (doi:10.7554/elife.57022), 2020-08-17
Supplement: supp [file elife-57022-supp-v1.zip]

# Theoretical model

## Emperical result

Assumption: A low temperature specialist competes with a high temperature generalist

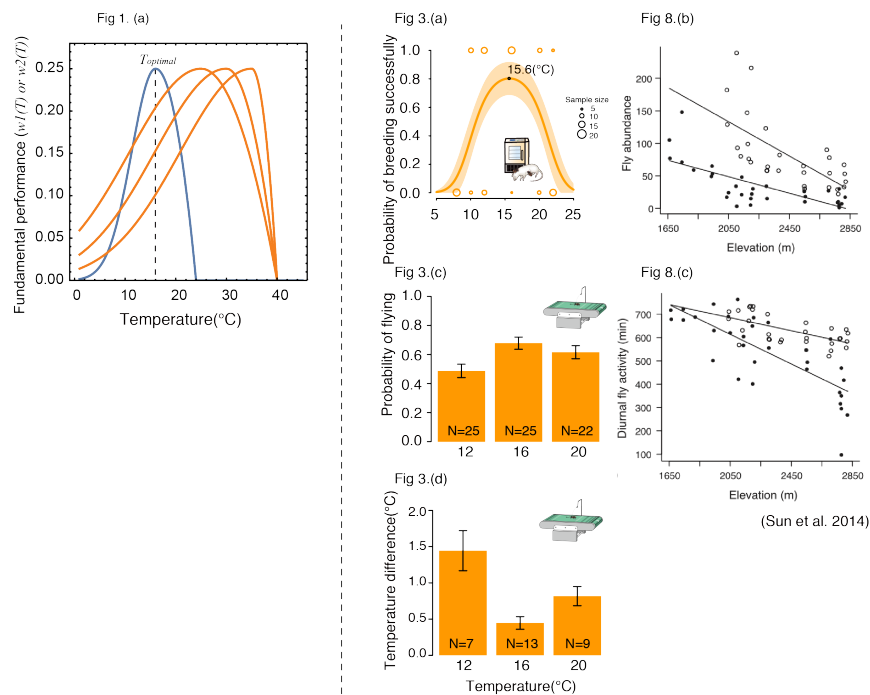

Prediciton: The optimal temperature of the realized thermal performance curev (TPC) will decrease to below that of the optimal of fundamental TPC.

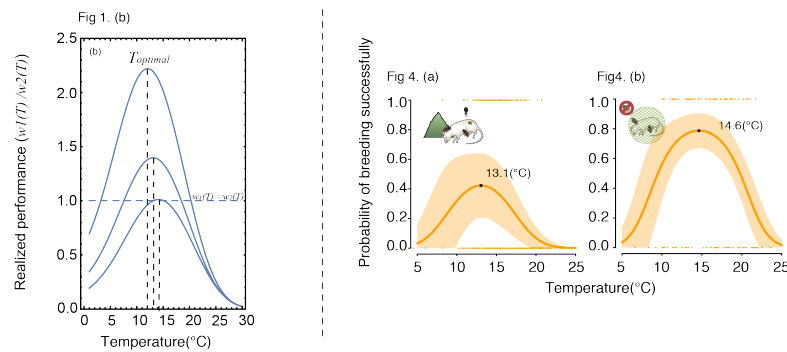

1

2 **Figure S2.** A summary of the theoretical and empirical data.
